# Supplementary material for: Mortality and Hospital Stay Associated with Resistant Staphylococcus aureus and Escherichia coli Bacteremia: Estimating the Burden of Antibiotic Resistance in Europe
Source: PubMed Central journal article supplement (PMC3191157; doi:10.1371/journal.pmed.1001104), 2011-10-11

Figure S2 Trends in the number of *E. coli* BSIs and the proportion of these that were resistant for third-generation cephalosporins for EARSS laboratories consistently reporting from 2003-2015. (A) Number of *E. coli* BSIs. (B) Proportion resistant for third-generation cephalosporins. Diamonds indicate ascertained values, and trendline projections are based on regression analysis; regression equations are included.

A

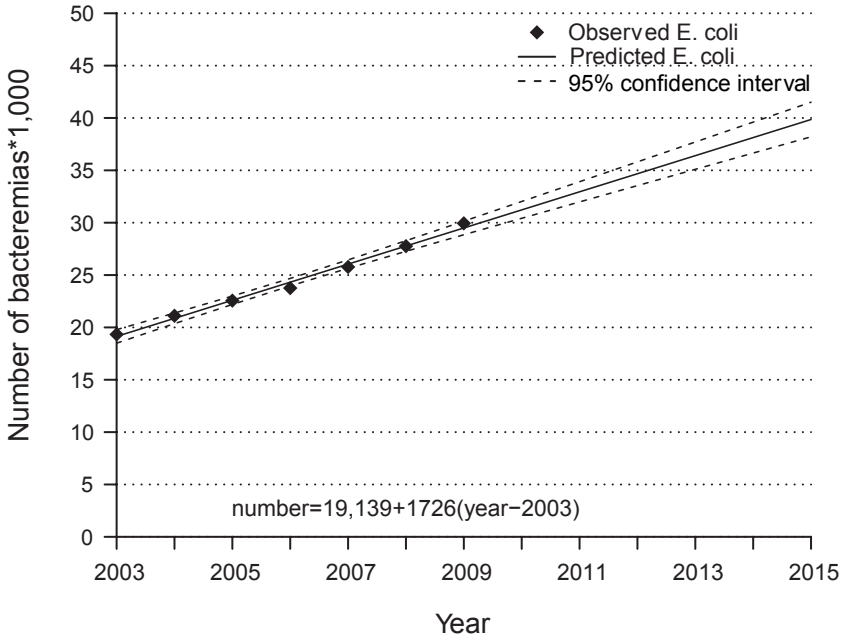

B

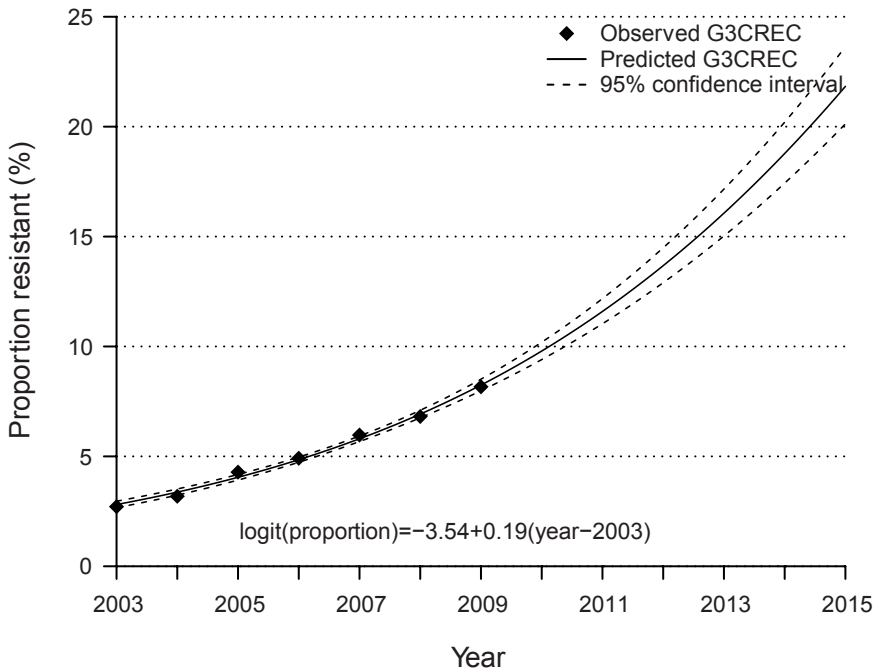

Supplement: pmed.1001104.s002.pdf [file pmed.1001104.s002.pdf]
