# Supplementary material for: Mortality and Hospital Stay Associated with Resistant Staphylococcus aureus and Escherichia coli Bacteremia: Estimating the Burden of Antibiotic Resistance in Europe
Source: PubMed Central journal article supplement (PMC3191157; doi:10.1371/journal.pmed.1001104), 2011-10-11
Supplement: pmed.1001104.s003.pdf [file pmed.1001104.s003.pdf]

**Table S1. Number of acute care beds for 2007:** beds per 10,000 inhabitants.

| <b>Country</b> | <b>Number of hospital beds<br/>(per 10,000 inhabitants)*</b> |
|----------------|--------------------------------------------------------------|
| Austria        | 56.8                                                         |
| Belgium        | 43.0                                                         |
| Bulgaria       | 49.1                                                         |
| Croatia        | 34.0                                                         |
| Cyprus         | 34.8                                                         |
| Czech Republic | 51.5                                                         |
| Denmark        | 30.8                                                         |
| Estonia        | 38.0                                                         |
| Finland        | 20.5                                                         |
| France         | 35.4                                                         |
| Germany        | 56.9                                                         |
| Greece         | 39.6                                                         |
| Hungary        | 41.4                                                         |
| Iceland        | 40.7                                                         |
| Ireland        | 26.7                                                         |
| Israel         | 21.1                                                         |
| Italy          | 31.4                                                         |
| Latvia         | 52.4                                                         |
| Lithuania      | 51.1                                                         |
| Luxembourg     | 44.4                                                         |
| Malta          | 26.9                                                         |
| Netherlands    | 28.9                                                         |
| Norway         | 27.6                                                         |
| Poland         | 46.2                                                         |
| Portugal       | 27.9                                                         |
| Romania        | 44.8                                                         |
| Slovenia       | 37.8                                                         |
| Spain          | 25.6                                                         |
| Sweden         | 23.2                                                         |
| Turkey         | 23.7                                                         |
| United Kingdom | 27.3                                                         |

\* All data were provided by Eurostat [7], except for Finland, National Public Health Institute (KTL); Iceland, Ministry of Health Iceland; Israel, Ministry of Health Israel; and Sweden, Swedish Institute for Infectious Disease Control.

### **Reference**

7. Eurostat (2010) Statistics Database [database]. Available: <http://epp.eurostat.ec.europa.eu/portal/page/portal/eurostat/home>. Accessed August 1, 2010.
