# Supplementary material for: Mortality and Hospital Stay Associated with Resistant Staphylococcus aureus and Escherichia coli Bacteremia: Estimating the Burden of Antibiotic Resistance in Europe
Source: PubMed Central journal article supplement (PMC3191157; doi:10.1371/journal.pmed.1001104), 2011-10-11
Supplement: pmed.1001104.s004.pdf [file pmed.1001104.s004.pdf]

**Table S2. Parameter estimates:** Adjusted odds ratios for 30-day mortality and excess length of hospital stay, in days, associated with methicillin-resistant (MRSA) and methicillin-susceptible (MSSA) *S. aureus* and third-generation cephalosporin-resistant (G3CREC) and cephalosporin-susceptible (G3CSEC) *E. coli* bacteremias, and the derived number needed to be exposed for one excess death (NNE) [3,4].

| Bacteremias | Adjusted odds ratio for 30-day mortality (CI <sub>95</sub> ) | NNE (CI <sub>95</sub> ) | Excess length of hospital stay in days (CI <sub>95</sub> ) |
|-------------|--------------------------------------------------------------|-------------------------|------------------------------------------------------------|
| MRSA        | 4.4 (2.8-7.0)                                                | 4.9 (3.4-9.2)           | 9.2 (5.2-13.5)                                             |
| MSSA        | 2.4 (1.7-3.3)                                                | 11.2 (7.4-20.0)         | 8.6 (6.8-10.4)                                             |
| G3CREC      | 4.6 (1.7-12.3)                                               | 6.3 (2.6-25.2)          | 7.9 (3.5-13.0)                                             |
| G3CSEC      | 1.9 (1.4-2.5)                                                | 18.9 (11.1-35.7)        | 2.9 (1.7-4.0)                                              |

CI<sub>95</sub>= 95% confidence interval

### References

- De Kraker MEA, Wolkewitz M, Davey PG, Koller W, Berger J, et al. (2011) Clinical impact of antimicrobial resistance in European hospitals: excess mortality and length of hospital stay related to methicillin-resistant *Staphylococcus aureus* bloodstream infections. *Antimicrob Agents Chemother* 55: 1598-1605.
- De Kraker MEA, Wolkewitz M, Davey PG, Koller W, Berger J, et al. (2011) Burden of antimicrobial resistance in European hospitals: excess mortality and length of hospital stay associated with bloodstream infections due to *Escherichia coli* resistant to third-generation cephalosporins. *J Antimicrob Chemother* 66: 398-407.
