# Supplementary material for: Mortality and Hospital Stay Associated with Resistant Staphylococcus aureus and Escherichia coli Bacteremia: Estimating the Burden of Antibiotic Resistance in Europe
Source: PubMed Central journal article supplement (PMC3191157; doi:10.1371/journal.pmed.1001104), 2011-10-11
Supplement: pmed.1001104.s005.pdf [file pmed.1001104.s005.pdf]

**Table S3. Estimated number of excess deaths associated with methicillin-susceptible (MSSA) and methicillin-resistant (MRSA) *S. aureus*, and third-generation cephalosporin-resistant (G3CREC) and third-generation cephalosporin-susceptible (G3CSEC) *E. coli* bacteremias in 2007.**

| Country                 | Estimated excess mortality (CI <sub>95</sub> ) |                    |                 |                    |
|-------------------------|------------------------------------------------|--------------------|-----------------|--------------------|
|                         | MRSA                                           | MSSA               | G3CREC          | G3CSEC             |
| Austria                 | 26 (15-40)                                     | 122 (67-182)       | 40 (9-87)       | 129 (64-205)       |
| Belgium                 | 50 (27-78)                                     | 75 (41-115)        | 15 (3-34)       | 112 (56-180)       |
| Bulgaria                | 13 (6-25)                                      | 41 (22-63)         | 25 (5-56)       | 26 (12-41)         |
| Croatia                 | 43 (24-64)                                     | 32 (17-48)         | 7 (1-15)        | 69 (34-110)        |
| Cyprus                  | 17 (9-27)                                      | 8 (5-13)           | 8 (2-18)        | 11 (5-17)          |
| Czech Rep.              | 51 (29-76)                                     | 153 (85-229)       | 35 (8-76)       | 148 (74-235)       |
| Denmark                 | 4 (1-11)                                       | 139 (77-210)       | 14 (3-35)       | 146 (72-233)       |
| Estonia <sup>a</sup>    | 4 (2-5)                                        | 17 (9-25)          | 0 (0-1)         | 12 (6-19)          |
| Finland                 | 2 (1-5)                                        | 52 (28-78)         | 6 (1-13)        | 89 (44-141)        |
| France                  | 898 (511-1364)                                 | 1157 (641-1746)    | 110 (24-241)    | 1696 (840-2695)    |
| Germany                 | 493 (220-924)                                  | 1107 (581-1765)    | 343 (65-860)    | 1222 (588-1979)    |
| Greece                  | 240 (126-397)                                  | 120 (61-197)       | 20 (3-63)       | 72 (33-125)        |
| Hungary <sup>a</sup>    | 55 (32-83)                                     | 83 (46-124)        | 11 (2-23)       | 63 (31-100)        |
| Iceland <sup>a</sup>    | 0                                              | 6 (3-9)            | 1 (0-2)         | 6 (3-9)            |
| Ireland <sup>a</sup>    | 101 (58-152)                                   | 74 (41-111)        | 16 (4-34)       | 94 (47-149)        |
| Israel                  | 114 (64-175)                                   | 105 (58-159)       | 100 (22-215)    | 193 (95-307)       |
| Italy                   | 532 (299-817)                                  | 466 (257-710)      | 205 (45-450)    | 523 (260-841)      |
| Latvia                  | 6 (3-10)                                       | 28 (15-43)         | 4 (1-9)         | 7 (4-12)           |
| Lithuania               | 7 (4-11)                                       | 32 (18-48)         | 5 (1-11)        | 20 (10-32)         |
| Luxembourg <sup>a</sup> | 5 (3-7)                                        | 8 (5-12)           | 2 (0-4)         | 15 (7-24)          |
| Malta <sup>a</sup>      | 11 (6-16)                                      | 4 (2-7)            | 3 (1-6)         | 6 (3-9)            |
| Netherlands             | 7 (2-20)                                       | 269 (148-409)      | 37 (8-85)       | 267 (132-428)      |
| Norway                  | 0                                              | 115 (64-175)       | 10 (2-24)       | 159 (79-253)       |
| Poland                  | 64 (33-107)                                    | 160 (87-247)       | 11 (2-32)       | 157 (77-254)       |
| Portugal                | 395 (225-595)                                  | 194 (108-294)      | 77 (17-166)     | 218 (109-347)      |
| Romania                 | 28 (12-53)                                     | 34 (17-57)         | 40 (8-95)       | 31 (15-53)         |
| Slovenia <sup>a</sup>   | 7 (4-11)                                       | 35 (20-53)         | 6 (1-13)        | 47 (23-75)         |
| Spain                   | 442 (250-672)                                  | 599 (332-905)      | 247 (54-534)    | 1040 (513-1657)    |
| Sweden                  | 5 (3-8)                                        | 228 (127-342)      | 16 (4-35)       | 248 (123-394)      |
| Turkey                  | 788 (445-1194)                                 | 690 (384-1046)     | 793 (178-1716)  | 377 (185-599)      |
| UK <sup>a</sup>         | 1096 (627-1650)                                | 1108 (615-1664)    | 504 (114-1078)  | 1174 (583-1863)    |
| Total                   | 5503 (3136-8276)                               | 7261 (4021-10,910) | 2712 (595-5780) | 8377 (4148-13,296) |

Countries include all European Union member states (excluding Slovakia), both candidate countries (Croatia and Turkey), two EFTA countries (Iceland and Norway), and Israel.

<sup>a</sup> Total number as reported to EARSS or by national health authorities (UK), CI solely based on CI of number needed to be exposed for one attributable death from the clinical outcome studies; CI<sub>95</sub> = 95% confidence interval; Rep. = Republic
