# Supplementary material for: Mortality and Hospital Stay Associated with Resistant Staphylococcus aureus and Escherichia coli Bacteremia: Estimating the Burden of Antibiotic Resistance in Europe
Source: PubMed Central journal article supplement (PMC3191157; doi:10.1371/journal.pmed.1001104), 2011-10-11
Supplement: pmed.1001104.s006.pdf [file pmed.1001104.s006.pdf]

**Table S4. Estimated excess number of bed-days and costs associated with methicillin-resistant (MRSA) and methicillin-susceptible (MSSA) *S. aureus* and third-generation cephalosporin-resistant (G3CREC) and third-generation cephalosporin-susceptible (G3CSEC) *E. coli* bacteremias in 2007.**

| Country              | Excess number of bed-days in thousands (CI <sub>95</sub> ) |                    |                 |                   | Excess costs in thousand Euros (CI <sub>95</sub> ) |                        |                  |                        |
|----------------------|------------------------------------------------------------|--------------------|-----------------|-------------------|----------------------------------------------------|------------------------|------------------|------------------------|
|                      | MRSA                                                       | MSSA               | G3CREC          | G3CSEC            | MRSA                                               | MSSA                   | G3CREC           | G3CSEC                 |
| Austria              | 1.2 (0.7-1.8)                                              | 11.6 (9.2-14.1)    | 1.8 (0.8-3.0)   | 6.6 (4.0-9.2)     | 279 (157-413)                                      | 2630 (2092-3192)       | 407 (180-674)    | 1492 (909-2083)        |
| Belgium              | 2.3 (1.2-3.6)                                              | 7.2 (5.5-8.9)      | 0.7 (0.3-1.2)   | 5.7 (3.5-8.0)     | 506 (273-787)                                      | 1575 (1218-1967)       | 147 (59-269)     | 1255 (762-1764)        |
| Bulgaria             | 0.6 (0.3-1.1)                                              | 3.9 (2.9-5.1)      | 1.1 (0.5-2.0)   | 1.3 (0.8-1.9)     | 20 (9-37)                                          | 127 (94-165)           | 36 (15-65)       | 42 (25-62)             |
| Croatia              | 2.0 (1.1-3.0)                                              | 3.0 (2.4-3.7)      | 0.3 (0.1-0.5)   | 3.5 (2.2-4.9)     | 136 (76-204)                                       | 207 (163-254)          | 21 (9-36)        | 243 (148-340)          |
| Cyprus               | 0.8 (0.4-1.3)                                              | 0.8 (0.6-1.1)      | 0.4 (0.1-0.6)   | 0.5 (0.3-0.8)     | 119 (64-185)                                       | 118 (87-156)           | 52 (22-94)       | 79 (47-115)            |
| Czech Rep.           | 2.3 (1.3-3.5)                                              | 14.5 (11.6-17.6)   | 1.6 (0.7-2.6)   | 7.5 (4.6-10.5)    | 214 (120-319)                                      | 1329 (1060-1612)       | 143 (63-237)     | 690 (420-963)          |
| Denmark              | 0.2 (0.1-0.5)                                              | 13.2 (10.3-16.4)   | 0.6 (0.2-1.3)   | 7.4 (4.5-10.5)    | 55 (15-143)                                        | 3745 (2906-4642)       | 182 (69-354)     | 2108 (1283-2978)       |
| Estonia <sup>a</sup> | 0.2 (0.1-0.2)                                              | 1.6 (1.3-2.0)      | 0.0             | 0.6 (0.4-0.9)     | 13 (8-20)                                          | 130 (103-158)          | 1 (1-2)          | 50 (31-70)             |
| Finland              | 0.1 (0.0-0.2)                                              | 4.9 (3.9-6.1)      | 0.3 (0.1-0.5)   | 4.5 (2.8-6.3)     | 27 (12-50)                                         | 1144 (901-1407)        | 59 (24-107)      | 1048 (643-1470)        |
| France               | 41.7 (23.3-62)                                             | 110.2 (87.6-134.0) | 4.9 (2.1-8.3)   | 86.3 (52.6-120.3) | 8941 (4999-13,281)                                 | 23,600 (18,757-28,711) | 1045 (450-1788)  | 18,489 (11,269-25,776) |
| Germany              | 22.9 (10.1-42.6)                                           | 105.4 (75.6-141.7) | 15.2 (5.3-32.4) | 62.2 (36.8-90.8)  | 4878 (2144-9077)                                   | 22,447 (16,093-30,167) | 3239 (1118-6890) | 13,238 (7840-19,337)   |
| Greece               | 11.1 (5.8-18.0)                                            | 11.4 (7.7-16.1)    | 0.9 (0.2-2.5)   | 3.6 (2.0-5.7)     | 1850 (967-2998)                                    | 1900 (1287-2679)       | 145 (32-422)     | 606 (340-940)          |
| Hungary <sup>a</sup> | 2.6 (1.5-3.8)                                              | 7.9 (6.3-9.6)      | 0.5 (0.2-0.8)   | 3.2 (2.0-4.5)     | 218 (123-322)                                      | 666 (530-809)          | 39 (17-65)       | 272 (166-380)          |

| Country                 | Excess number of bed-days in thousands (CI <sub>95</sub> ) |                  |                 |                     | Excess costs in thousand Euros (CI <sub>95</sub> ) |                    |                 |                    |
|-------------------------|------------------------------------------------------------|------------------|-----------------|---------------------|----------------------------------------------------|--------------------|-----------------|--------------------|
|                         | MRSA                                                       | MSSA             | G3CREC          | G3CSEC              | MRSA                                               | MSSA               | G3CREC          | G3CSEC             |
| Iceland <sup>a</sup>    | 0.0                                                        | 0.6 (0.4-0.7)    | 0.0 (0.0-0.1)   | 0.3 (0.2-0.4)       | 0                                                  | 164 (131-199)      | 9 (4-15)        | 86 (52-120)        |
| Ireland <sup>a</sup>    | 4.7 (2.6-6.9)                                              | 7.1 (5.6-8.6)    | 0.7 (0.3-1.2)   | 4.8 (2.9-6.7)       | 1367 (770-2023)                                    | 2065 (1642-2507)   | 203 (90-337)    | 1397 (851-1949)    |
| Israel                  | 5.3 (2.9-7.9)                                              | 10.0 (7.8-12.3)  | 4.4 (1.9-7.4)   | 9.8 (6.0-13.8)      | 662 (367-991)                                      | 1252 (977-1545)    | 553 (240-930)   | 1228 (751-1721)    |
| Italy                   | 24.7<br>(13.7-37.2)                                        | 44.4 (34.5-55.0) | 9.1 (3.9-15.6)  | 26.6<br>(16.1-37.5) | 4811 (2670-7252)                                   | 8635 (6718-10,711) | 1770 (758-3046) | 5183 (3132-7310)   |
| Latvia                  | 0.3 (0.1-0.4)                                              | 2.7 (2.1-3.3)    | 0.2 (0.1-0.3)   | 0.4 (0.2-0.5)       | 16 (8-27)                                          | 162 (127-203)      | 11 (4-21)       | 23 (14-33)         |
| Lithuania               | 0.3 (0.2-0.5)                                              | 3 (2.4-3.7)      | 0.2 (0.1-0.4)   | 1.0 (0.6-1.4)       | 19 (10-32)                                         | 180 (141-224)      | 13 (5-24)       | 61 (37-86)         |
| Luxembourg <sup>a</sup> | 0.2 (0.1-0.3)                                              | 0.8 (0.6-0.9)    | 0.1 (0.0-0.1)   | 0.8 (0.5-1.1)       | 93 (52-138)                                        | 328 (261-398)      | 37 (16-61)      | 319 (194-445)      |
| Malta <sup>a</sup>      | 0.5 (0.3-0.8)                                              | 0.4 (0.3-0.5)    | 0.1 (0.1-0.2)   | 0.3 (0.2-0.4)       | 51 (29-76)                                         | 43 (34-53)         | 12 (5-20)       | 30 (18-41)         |
| Netherlands             | 0.3 (0.1-0.9)                                              | 25.6 (20.0-31.6) | 1.6 (0.6-3.0)   | 13.6 (8.2-19.1)     | 78 (21-208)                                        | 5971 (4662-7390)   | 378 (150-711)   | 3177 (1923-4467)   |
| Norway                  | 0                                                          | 11.0 (8.6-13.5)  | 0.5 (0.2-0.9)   | 8.1 (4.9-11.3)      | 0                                                  | 3865 (3033-4758)   | 164 (65-306)    | 2850 (1736-3996)   |
| Poland                  | 3.0 (1.5-4.9)                                              | 15.2 (11.6-19.5) | 0.5 (0.1-1.2)   | 8 (4.8-11.4)        | 195 (98-322)                                       | 998 (758-1277)     | 33 (9-81)       | 523 (317-747)      |
| Portugal                | 18.4<br>(10.3-27.3)                                        | 18.5 (14.6-22.6) | 3.4 (1.5-5.7)   | 11.1 (6.7-15.5)     | 2276 (1277-3383)                                   | 2294 (1812-2803)   | 423 (186-712)   | 1378 (837-1922)    |
| Romania                 | 1.3 (0.6-2.5)                                              | 3.3 (2.1-4.8)    | 1.8 (0.7-3.4)   | 1.6 (0.9-2.4)       | 57 (25-110)                                        | 146 (96-213)       | 79 (30-151)     | 71 (40-107)        |
| Slovenia <sup>a</sup>   | 0.3 (0.2-0.5)                                              | 3.4 (2.7-4.1)    | 0.3 (0.1-0.5)   | 2.4 (1.5-3.3)       | 31 (17-46)                                         | 319 (254-387)      | 26 (12-43)      | 226 (138-315)      |
| Spain                   | 20.5<br>(11.4-30.8)                                        | 57.1 (45.1-70.0) | 10.9 (4.8-18.5) | 52.9<br>(32.3-73.9) | 3529 (1964-5299)                                   | 9816 (7749-12,030) | 1882 (825-3186) | 9097 (5553-12,704) |

| Country         | Excess number of bed-days in thousands (CI <sub>95</sub> ) |                       |                       |                        | Excess costs in thousand Euros (CI <sub>95</sub> ) |                             |                         |                            |
|-----------------|------------------------------------------------------------|-----------------------|-----------------------|------------------------|----------------------------------------------------|-----------------------------|-------------------------|----------------------------|
|                 | MRSA                                                       | MSSA                  | G3CREC                | G3CSEC                 | MRSA                                               | MSSA                        | G3CREC                  | G3CSEC                     |
| Sweden          | 0.2 (0.1-0.4)                                              | 21.7 (17.3-26.3)      | 0.7 (0.3-1.2)         | 12.6 (7.7-17.6)        | 58 (32-90)                                         | 5432 (4323-6588)            | 178 (79-297)            | 3152 (1923-4398)           |
| Turkey          | 36.6 (20.5-55)                                             | 65.8 (52.0-80.5)      | 35.1<br>(15.4-59.0)   | 19.2<br>(11.6-27.0)    | 1705 (956-2560)                                    | 3061 (2420-3748)            | 1634 (719-2747)         | 892 (540-1259)             |
| UK <sup>a</sup> | 50.9<br>(28.7-75.4)                                        | 105.5<br>(83.9-128.1) | 22.3 (9.9-36.9)       | 59.7<br>(36.4-83.3)    | 11,755<br>(6622-17,393)                            | 24,350<br>(19,362-29,557)   | 5147 (2279-8525)        | 13,782 (8398-19,233)       |
| <b>Total</b>    | 255.7<br>(142.9-375.9)                                     | 691.4<br>(548.5-840)  | 120.1<br>(52.3-198.3) | 426.2<br>(259.6-594.9) | 43,961<br>(23,885-67,786)                          | 128,701<br>(99,791-160,510) | 18,068<br>(7535-32,216) | 83,087<br>(50,337-117,131) |

Countries include all European Union member states (excluding Slovakia), both candidate countries (Croatia and Turkey), two EFTA countries (Iceland and Norway), and Israel.

<sup>a</sup>Total number as reported to EARSS or by national health authorities (UK), CI solely based on CI of the excess length of stay estimate from the clinical outcome studies; CI<sub>95</sub>= 95% confidence interval; Rep. = Republic
